# Supplementary material for: Cross-cultural adaptation and measurement properties of the Nepali version of the DASH (disability of arm, shoulder and hand) in patients with shoulder pain
Source: PubMed Central journal article supplement (PMC6429798; doi:10.1186/s12955-019-1105-1), 2019-03-21
Supplement: 12955_2019_1105_MOESM1_ESM.pdf [file 12955_2019_1105_MOESM1_ESM.pdf]

# पाखुरा, काँध र हातको असक्षमताहरू (DASH-NP)

## ड्याश

### निर्देशनहरू

यो प्रश्नावलीले तपाईंको लक्षणहरूको साथै केहि कार्यहरू गर्नसक्ने तपाईंको क्षमताको बारेमा सोध्छ ।

गत हप्ताको तपाईंको अवस्थाको आधारमा उपयुक्त संख्यामा गोलो लगाएर कृपया प्रत्येक प्रश्नको उत्तर दिनुहोस् ।

यदि गत हप्ता कुनै क्रियाकलाप गर्ने मौका नपाएको भए उचित जवाफमा सबैभन्दा राम्रो अनुमान लगाउनुहोस् ।

तपाईंले जुन हात प्रयोग गरेर कार्य गरेपनि फरक पर्दैन ; तपाईंले सो कार्य जसरी गरे पनि कृपया आफ्नो क्षमताको आधारमा उत्तर दिनुहोस् ।

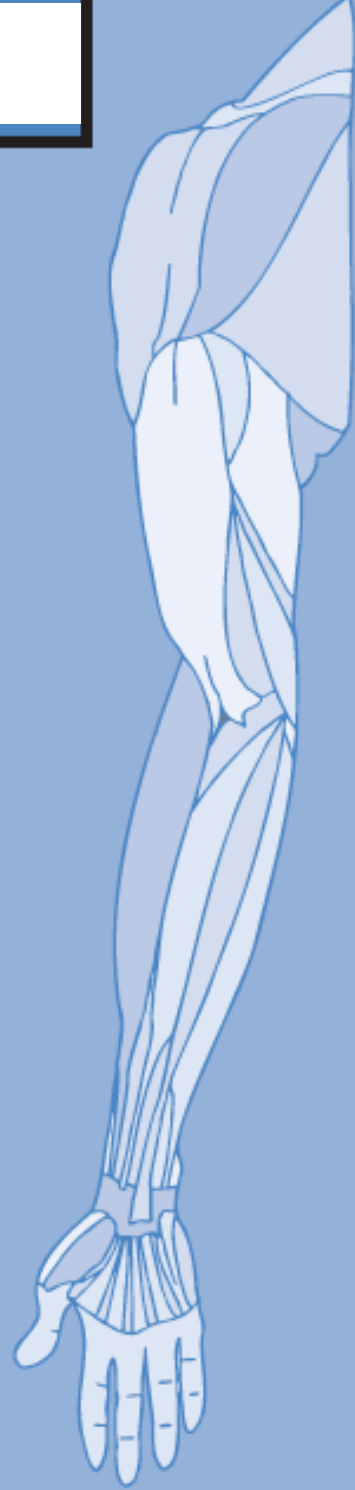

# पाखुरा, काँध र हातको असक्षमताहरु (DASH-NP)

गत हप्ता निम्न क्रियाकलापहरु गर्न सक्ने आफ्नो क्षमताको मुल्यांकन गर्न कृपया उपयुक्त जवाफ मुनि भएको अंकमा गोलो लगाउनुहोस् ।

|                                                                                                                                                                                | गाह्रो छैन | थोरै गाह्रो | मध्यम गाह्रो | धेरै गाह्रो | गर्न सकिँदैन |
|--------------------------------------------------------------------------------------------------------------------------------------------------------------------------------|------------|-------------|--------------|-------------|--------------|
| १. कस्सिएको अथवा नयाँ बट्टाको बिको खोल्न                                                                                                                                       | १          | २           | ३            | ४           | ५            |
| २. लेख्न                                                                                                                                                                       | १          | २           | ३            | ४           | ५            |
| ३. साँचो घुमाउन                                                                                                                                                                | १          | २           | ३            | ४           | ५            |
| ४. खाना पकाउन                                                                                                                                                                  | १          | २           | ३            | ४           | ५            |
| ५. धकेलेर गहुँगो ढोका खोल्न                                                                                                                                                    | १          | २           | ३            | ४           | ५            |
| ६. टाउको भन्दा अग्लो ठाउँमा सामान राख्न                                                                                                                                        | १          | २           | ३            | ४           | ५            |
| ७. गार्हो घरेलु काम गर्न (जस्तै भित्ता सफा गर्न, भुईँ पुछ्न)                                                                                                                   | १          | २           | ३            | ४           | ५            |
| ८. बारी/बगैँचाको काम गर्न                                                                                                                                                      | १          | २           | ३            | ४           | ५            |
| ९. ओछ्यान मिलाउन                                                                                                                                                               | १          | २           | ३            | ४           | ५            |
| १०. किनमेलको झोला बोक्न                                                                                                                                                        | १          | २           | ३            | ४           | ५            |
| ११. गहुँगो सामान बोक्न (५ किलो भन्दा माथि)                                                                                                                                     | १          | २           | ३            | ४           | ५            |
| १२. टाउको भन्दा अग्लो ठाउँको चिम फेर्न                                                                                                                                         | १          | २           | ३            | ४           | ५            |
| १३. कपाल नुहाउन/सुकाउन                                                                                                                                                         | १          | २           | ३            | ४           | ५            |
| १४. ढाड नुहाउन                                                                                                                                                                 | १          | २           | ३            | ४           | ५            |
| १५. टाँख नभएको स्वीटर लगाउन                                                                                                                                                    | १          | २           | ३            | ४           | ५            |
| १६. चक्कुले खानेकुरा काट्न                                                                                                                                                     | १          | २           | ३            | ४           | ५            |
| १७. थोरै प्रयासबाट गर्न सकिने समय बिताउन गरिने क्रियाकलापहरु (जस्तै, तास खेलाई, बुनाई आदि)                                                                                     | १          | २           | ३            | ४           | ५            |
| १८. समय बिताउन गरिने क्रियाकलापहरु जसमा तपाईंको काँध, पाखुरा र हातको केहि बल लाग्छ अथवा ती अंगहरुमा केहि प्रभाव पर्छ (जस्तै, क्रिकेटमा ब्याटिङ गर्ने, भलिबल, हम्मर चलाउने आदि) | १          | २           | ३            | ४           | ५            |
| १९. समय बिताउन गरिने क्रियाकलापहरु जसमा तपाईंले आफ्नो हात खुलेर चलाउनुहुन्छ (जस्तै, ब्याडमिन्टन, टेबल टेनिस, क्रिकेटमा बलिङ गर्ने, आदि)                                        | १          | २           | ३            | ४           | ५            |
| २०. एक ठाउँबाट अर्को ठाउँमा गाडीमा जान                                                                                                                                         | १          | २           | ३            | ४           | ५            |
| २१. यौन क्रियाकलापहरु                                                                                                                                                          | १          | २           | ३            | ४           | ५            |

## पाखुरा, काँध र हातको असक्षमताहरू (DASH-NP)

कतिपनि छैन थोरै मध्यम धेरै अत्याधिक

२२. गत हप्तामा, तपाईंको पाखुरा, हात अथवा काँधको समस्याले आफ्नो परिवार, साथीहरू, क्षिमेकिहरू अथवा समुहहरूसँग गरिने सामान्य सामाजिक क्रियाकलापहरूमा कति हदसम्म बाँधा पुर्यायो ? (अंकमा गोलो लगाउनुस)

१ २ ३ ४ ५

सिमित थिएन थोरै मध्यम धेरै गर्ने सकिँन  
सिमित सिमित सिमित

२३. गत हप्तामा, तपाईंको पाखुरा, हात अथवा काँधको समस्याको कारणले, तपाईंले काममा अथवा अन्य दैनिक क्रियाकलापहरूमा कति सिमित हुनुभयो? गत हप्ता भएको निम्न समस्याहरूको मात्राको कृपया मूल्याङ्कन गर्नहोस् । (अंकमा गोलो लगाउनुस)

१ २ ३ ४ ५

छैन थोरै मध्यम धेरै अत्याधिक

२४. पाखुरा, काँध अथवा हातको दुखाई

१ २ ३ ४ ५

२५. कुनै विशेष क्रियाकलाप गर्दा पाखुरा, काँध अथवा हातमा हुने दुखाई

१ २ ३ ४ ५

२६. पाखुरा, काँध अथवा हातमा झम-झम हुने

१ २ ३ ४ ५

२७. पाखुरा, काँध अथवा हातको कमजोरी

१ २ ३ ४ ५

२८. पाखुरा, काँध अथवा हात जाम हुने

१ २ ३ ४ ५

गाह्रो छैन थोरै गाह्रो मध्यम गाह्रो धेरै गाह्रो यति धेरै गाह्रो कि  
म सुत्न सकिँन

२९. गएको हप्तामा, तपाईंको पाखुरा, काँध अथवा हातको दुखाईको कारणले सुत्न कतिको गाह्रो भएको छ ? (अंकमा गोलो लगाउनुस)

१ २ ३ ४ ५

एकदमै असहमत न त सहमत सहमत एकदमै  
असहमत न त असहमत सहमत

३०. मेरो पाखुरा, काँध अथवा हातको समस्याको कारणले आफुलाई कम सक्षम, कम आत्मनिर्भर अथवा कम उपयोगी महसुश गर्छु । (अंकमा गोलो लगाउनुस)

१ २ ३ ४ ५

# पाखुरा, काँध र हातको असक्षमताहरू (DASH-NP)

## कार्य भाग (वैकल्पिक)

निम्न प्रश्नहरूले तपाईंको पाखुरा, हात अथवा काँधको समस्याको कारणले तपाईंको कार्यक्षमतामा पारेको असरको बारे सोध्छ (घरको काम यदि यो तपाईंको प्रमुख काम हो भने) ।

कृपया, तपाईंको काम उल्लेख गर्नुहोस्: \_\_\_\_\_

म काम गर्दिन । (तपाईंले यो भाग छोड्न सक्नुहुन्छ ।)

गत हप्ताको तपाईंको शारीरिक क्षमताको राम्रो बयान गर्न कृपया, एक संख्यामा गोलो लगाउनुहोस्। तपाईंलाई कति गाह्रो थियो ?

|                                                                    | गाह्रो थिएन | थोरै गाह्रो | मध्यम गाह्रो | धेरै गाह्रो | गर्न सकिँन |
|--------------------------------------------------------------------|-------------|-------------|--------------|-------------|------------|
| १. सामान्य तरिकाले आफ्नो काम गर्न ?                                | १           | २           | ३            | ४           | ५          |
| २. तपाईंको पाखुरा, काँध अथवा हातको दुखाईको कारणले सधैको काम गर्न ? | १           | २           | ३            | ४           | ५          |
| ३. आफुले चाहे जस्तै राम्रोसंग काम गर्न ?                           | १           | २           | ३            | ४           | ५          |
| ४. सधै जस्तो समय खर्च गरेर आफ्नो काम गर्न ?                        | १           | २           | ३            | ४           | ५          |

## खेलकुद/कला प्रदर्शन भाग (वैकल्पिक)

निम्न प्रश्नहरू तपाईंको पाखुरा, हात अथवा काँधको समस्याको कारणले तपाईंको खेलमा वा सांगीतिक बाजा बजाउनमा पारेको असरको बारेमा सम्बन्धित छ यदि एक भन्दा बढि खेल खेल्नुहुन्छ वा सांगीतिक बाजा बजाउनुहुन्छ (वा दुवै) भने ति मध्य सबैभन्दा महत्वपूर्ण कृत्याकलापको आधारमा कृपया उत्तर दिनुहोस् ।

कृपया, तपाईंको सबैभन्दा महत्वपूर्ण खेल वा बाजा उल्लेख गर्नुहोस्: \_\_\_\_\_

म खेल खेल्दिन वा कुनै बाजा बजाउदिन। (तपाईंले यो भाग छोड्न सक्नुहुन्छ ।)

गत हप्ताको तपाईंको शारीरिक क्षमताको राम्रो बयान गर्न कृपया, एक संख्यामा गोलो लगाउनुहोस्। तपाईंलाई केहि गाह्रो थियो ?

|                                                                                  | गाह्रो थिएन | थोरै गाह्रो | मध्यम गाह्रो | धेरै गाह्रो | गर्न सकिँन |
|----------------------------------------------------------------------------------|-------------|-------------|--------------|-------------|------------|
| १. आफ्नो तरिकाले खेल खेल्न वा बाजा बजाउन?                                        | १           | २           | ३            | ४           | ५          |
| २. तपाईंको पाखुरा, काँध अथवा हातको दुखाईको कारणले सधैको खेल खेल्न वा बाजा बजाउन? | १           | २           | ३            | ४           | ५          |
| ३. आफुले चाहे जस्तै सधैको खेल खेल्न वा बाजा बजाउन?                               | १           | २           | ३            | ४           | ५          |
| ४. सधै जस्तो समय खर्च गरेर आफ्नो खेल खेल्न वा बाजा बजाउन?                        | १           | २           | ३            | ४           | ५          |
